# Supplementary material for: Predictive Factors for Impaired Mental Health among Medical Students during the Early Stage of the COVID-19 Pandemic in Morocco
Source: PubMed Central journal article supplement (PMC7790070; doi:10.4269/ajtmh.20-1302), 2020-11-17
Supplement: tpmd201302.SD1.pdf [file tpmd201302.SD1.pdf]

## Supplemental Appendix 1: Milestone events during the COVID-19 pandemic in Morocco

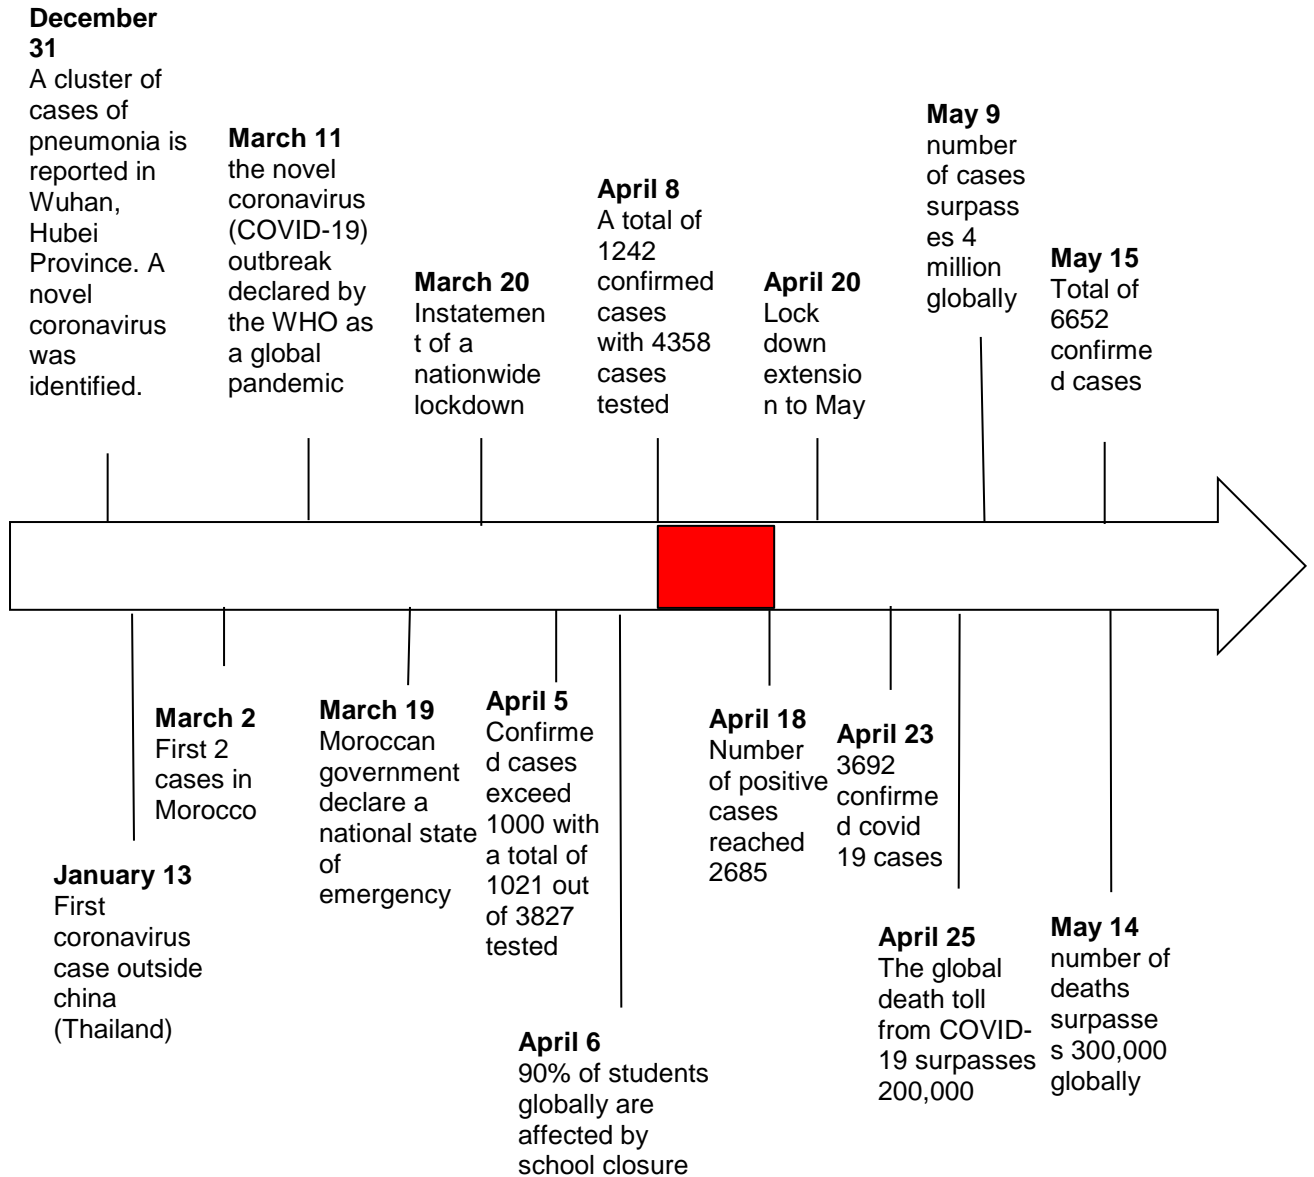

\*This study was conducted from April 8 to April 18, 2020.
